# Supplementary material for: Twenty-five Years of Research Experience with the Sterile Insect Technique and Area-Wide Management of Codling Moth, Cydia pomonella (L.), in Canada
Source: PubMed Central journal article supplement (PMC6780149; doi:10.3390/insects10090292), 2019-09-10
Supplement: insects-10-00292-s001.pdf [file insects-10-00292-s001.pdf]

1 *Supplementary Material*

2 **Twenty-five Years of Research Experience with the**  
3 **Sterile Insect Technique and Area-Wide Management**  
4 **of Codling Moth, *Cydia pomonella* (L.), in Canada**

5 **Howard M. A. Thistlewood <sup>1,2,\*</sup> and Gary J. R. Judd <sup>1</sup>**

6 <sup>1</sup> Summerland Research and Development Centre, Agriculture and Agri-Food Canada, Summerland, BC  
7 V0H 1Z0, Canada

8 <sup>2</sup> Department of Biology, University of British Columbia, 3333 University Way, Kelowna, BC V1V 1V7,  
9 Canada

10 \* Correspondence: howard.thistlewood@Canada.ca; Tel.: +1-250-494-6419

11 Received: 12 July 2019; Accepted: 2 September 2019; Published: date

12 The Supplemental materials contain the locations of documents and reports which are also  
13 available directly from internet sources. Contact the authors for copies of other materials cited.

14 **Table 1.** Locations of selected documents at internet sources on 15 August 2019.

| Reference | Location url                                                                                                                                                                      |
|-----------|-----------------------------------------------------------------------------------------------------------------------------------------------------------------------------------|
| 15 1.     | <a href="http://www.Oksir.Org/wp-content/uploads/2016/07/sirguide042011final.Pdf">http://www.Oksir.Org/wp-content/uploads/2016/07/sirguide042011final.Pdf</a>                     |
| 16 4.     | <a href="http://www-naweb.iaea.org/nafa/ipc/Cara-Nelson.pdf">http://www-naweb.iaea.org/nafa/ipc/Cara-Nelson.pdf</a>                                                               |
| 17 12.    | <a href="http://www-naweb.iaea.org/nafa/ipc/public/ipc-sterile-insect-technique.html">http://www-naweb.iaea.org/nafa/ipc/public/ipc-sterile-insect-technique.html</a>             |
| 18 35.    | <a href="https://www.cabi.org/cabebooks/ebook/20083134928">https://www.cabi.org/cabebooks/ebook/20083134928</a>                                                                   |
| 19 45.    | <a href="http://www-naweb.iaea.org/nafa/ipc/public/Area-Wide-Control-Insect-Pests-book.pdf">http://www-naweb.iaea.org/nafa/ipc/public/Area-Wide-Control-Insect-Pests-book.pdf</a> |
| 20 46.    | <a href="http://www-naweb.iaea.org/nafa/ipc/public/Area-Wide-Control-Insect-Pests-book.pdf">http://www-naweb.iaea.org/nafa/ipc/public/Area-Wide-Control-Insect-Pests-book.pdf</a> |
| 21 47.    | <a href="https://opdmc.org/wp-content/uploads/2019/01/2004OPDMC-Abstracts.pdf">https://opdmc.org/wp-content/uploads/2019/01/2004OPDMC-Abstracts.pdf</a>                           |
| 22 55.    | <a href="http://www.oksir.org/wp-content/uploads/2016/08/Strategic-Plan-12_June_2.pdf">http://www.oksir.org/wp-content/uploads/2016/08/Strategic-Plan-12_June_2.pdf</a>           |
| 23 56.    | <a href="https://www.oksir.org/orchard-information/trap-viewer/">https://www.oksir.org/orchard-information/trap-viewer/</a>                                                       |
| 24 57.    | <a href="https://www.oksir.org/orchard-information/codling-moth-maps/">https://www.oksir.org/orchard-information/codling-moth-maps/</a>                                           |
| 25 58.    | <a href="https://www.goodfruit.com/sterile-codling-moth-factory-a-funky-business/">https://www.goodfruit.com/sterile-codling-moth-factory-a-funky-business/</a>                   |
| 26 62.    | <a href="http://www-naweb.iaea.org/nafa/ipc/public/ipc-area-wide-control.html">http://www-naweb.iaea.org/nafa/ipc/public/ipc-area-wide-control.html</a>                           |
| 27 65.    | <a href="http://library-1.okanagan.bc.ca/vwebv/ocir/SIR_B_C_Analysis_Report.pdf">http://library-1.okanagan.bc.ca/vwebv/ocir/SIR_B_C_Analysis_Report.pdf</a>                       |
| 28 67.    | <a href="http://www.fao.org/3/i1537e/i1537e00.htm">http://www.fao.org/3/i1537e/i1537e00.htm</a>                                                                                   |
| 29 75.    | <a href="http://www-naweb.iaea.org/nafa/ipc/public/ipc-codling-moth-sit.pdf">http://www-naweb.iaea.org/nafa/ipc/public/ipc-codling-moth-sit.pdf</a>                               |
| 30 101.   | <a href="http://www-naweb.iaea.org/nafa/ipc/public/EL_Lepidopterous_sterility_1971.pdf">http://www-naweb.iaea.org/nafa/ipc/public/EL_Lepidopterous_sterility_1971.pdf</a>         |
| 31 106.   | <a href="http://www-naweb.iaea.org/nafa/ipc/public/El_Computer_Models.pdf">http://www-naweb.iaea.org/nafa/ipc/public/El_Computer_Models.pdf</a>                                   |
| 32 120.   | <a href="http://www-naweb.iaea.org/nafa/ipc/public/Sterile_Insect_Technique_book.pdf">http://www-naweb.iaea.org/nafa/ipc/public/Sterile_Insect_Technique_book.pdf</a>             |
| 33 129.   | <a href="http://www.oksir.org/wp-content/uploads/2016/08/SIR_Report_PGill_June15_2014.pdf">http://www.oksir.org/wp-content/uploads/2016/08/SIR_Report_PGill_June15_2014.pdf</a>   |
| 34 187.   | <a href="http://www-naweb.iaea.org/nafa/ipc/public/Sterile_Insect_Technique_book.pdf">http://www-naweb.iaea.org/nafa/ipc/public/Sterile_Insect_Technique_book.pdf</a>             |
| 35        |                                                                                                                                                                                   |

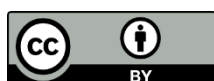

© 2019 by the authors. Submitted for possible open access publication under the terms and conditions of the Creative Commons Attribution (CC BY) license (<http://creativecommons.org/licenses/by/4.0/>).

36
